# Supplementary material
Source: ML conference proceedings conference paper supplement (https://proceedings.mlr.press/v108/mutny20a.html)
Supplement: Supplementary file [file mutny20a-supp.pdf]

**Supplementary Material:**  
**Convergence Analysis of Block Coordinate Algorithms**  
**with Determinantal Sampling**

## A PROOFS

### A.1 DPPs

*Proof of Theorem 1.* First, assume that  $\alpha = 1$ . Since  $\mathbf{M} \succ \mathbf{0}$ , we have  $\det(\mathbf{M}_{SS}) > 0$  for all  $S \subseteq [d]$ . We will next use the following standard determinantal formula which holds for any  $v \in \mathbb{R}^d$  and any invertible matrix  $\mathbf{M}$ :

$$\det(\mathbf{M})v^\top \mathbf{M}^{-1}v = \det(\mathbf{M} + vv^\top) - \det(\mathbf{M}). \quad (13)$$

Applying this formula to the submatrices of  $\mathbf{M}$  and denoting by  $v_S$  the sub-vector of  $v$  indexed by  $S$ , we show that for any  $v \in \mathbb{R}^d$ :

$$\begin{aligned} v^\top \mathbb{E}[(\mathbf{M}_S)^+]v &= \sum_{S \subseteq [d]} \frac{\det(\mathbf{M}_{SS})}{\det(\mathbf{I} + \mathbf{M})} v_S^\top \mathbf{M}_{SS}^{-1} v_S \\ (13) &= \sum_{S \subseteq [d]} \frac{\det(\mathbf{M}_{SS} + v_S v_S^\top) - \det(\mathbf{M}_{SS})}{\det(\mathbf{I} + \mathbf{M})} \\ &= \frac{\sum_S \det([\mathbf{M} + vv^\top]_{SS}) - \sum_S \det(\mathbf{M}_{SS})}{\det(\mathbf{I} + \mathbf{M})} \\ (\text{Lemma 1}) &= \frac{\det(\mathbf{I} + \mathbf{M} + vv^\top) - \det(\mathbf{I} + \mathbf{M})}{\det(\mathbf{I} + \mathbf{M})} \\ (13) &= \frac{\det(\mathbf{I} + \mathbf{M}) v^\top (\mathbf{I} + \mathbf{M})^{-1} v}{\det(\mathbf{I} + \mathbf{M})} \\ &= v^\top (\mathbf{I} + \mathbf{M})^{-1} v. \end{aligned}$$

Since the above holds for all  $v$ , the equality also holds for the pd. matrices. To obtain the result with  $\alpha \neq 1$ , it suffices to replace  $\mathbf{M}$  with  $\frac{1}{\alpha}\mathbf{M}$ .  $\square$

*Proof of Lemma 3.* The eigenvalues of  $\mathbf{M}(\alpha\mathbf{I} + \mathbf{M})^{-1}$  are  $\frac{\lambda_i}{\lambda_i + \alpha}$  so

$$\begin{aligned} \mathbb{E}[|S|] &= \sum_{i=1}^d \frac{\lambda_i}{\lambda_i + \alpha} = \sum_{i=1}^d \frac{\lambda_i}{\lambda_i + \sum_{j \geq k} \lambda_j} \\ &= \sum_{i < k} \frac{\lambda_i}{\lambda_i + \sum_{j \geq k} \lambda_j} + \sum_{i \geq k} \frac{\lambda_i}{\lambda_i + \sum_{j \geq k} \lambda_j} \\ &< (k-1) + 1 = k, \end{aligned}$$

which concludes the proof.  $\square$

### A.2 Convergence Analysis

*Proof of Theorem 2.*

$$\sigma_1 \stackrel{(7)}{=} \lambda_{\min} \left( \mathbf{M}^{1/2} (\alpha\mathbf{I} + \mathbf{M})^{-1} \mathbf{M}^{1/2} \right) \quad (14)$$

$$= \lambda_{\min} \left( (\alpha\mathbf{M}^{-1} + \mathbf{I})^{-1} \right) \quad (15)$$

$$= \frac{1}{\lambda_{\max}(\alpha\mathbf{M}^{-1} + \mathbf{I})} = \frac{1}{1 + \alpha\lambda_{\max}(\mathbf{M}^{-1})} \quad (16)$$

$$= \frac{\mu}{\mu + \alpha} \quad (17)$$

$$(18)$$

where  $\mu = \lambda_{\min}(\mathbf{M})$ . □

*Proof of Proposition 1.* By definition,

$$\frac{1}{\sigma(k+1)} = 1 + \frac{\sum_{i>k}^d \lambda_i}{\lambda_d} = 1 + \frac{\sum_{i>k-1}^d \lambda_i - \lambda_k}{\lambda_d} = \frac{1}{\sigma(k)} - \frac{\lambda_k}{\lambda_d}$$

Rearranging,

$$\frac{1}{\sigma(k)} = \frac{1}{\sigma(k+1)} + \frac{\lambda_k}{\lambda_d} \implies \sigma(k) = \frac{\sigma(k+1)\lambda_d}{\lambda_d + \lambda_k\sigma(k+1)}$$

Dividing the denominator and the numerator by  $\lambda_d$  finishes the proof. □

### A.3 Dual convergence rate

The dual convergence rate established in [Qu et al. \(2016\)](#) relies on the notion of expected separable over-approximation. Namely, the existence of  $v \in \mathbb{R}^d$  s.t.  $\mathbb{E}[\mathbf{M}_S] \preceq \mathbf{D}(p \circ v)$ , where  $p$  is the vector of marginal probabilities. In case of DPP sampling, one can choose  $v = \text{diag}(\mathbf{M}) \circ \text{diag}(\mathbf{M}(\mathbf{M} + \alpha\mathbf{I})^{-1})^{-1}$ , and apply dual convergence results established in this literature. By  $\circ$  we denote element-wise product.

## B LEVERAGE SCORE SAMPLING VS DPP SAMPLING

We perform a simple experiment on the Gaussian Mixtures dataset where the matrix has a sparse spectrum. In [Figure 5](#) we see that the optimization process is influenced minimally.

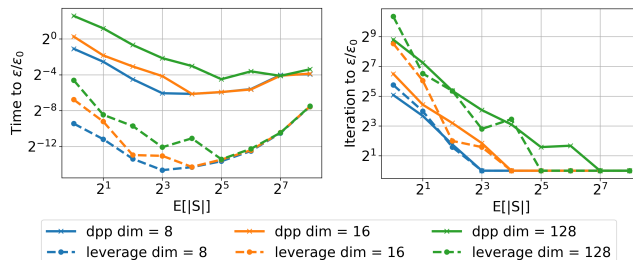

Figure 5: Comparison of leverage score sampling and DPP

## C RELATIVE SMOOTHNESS AND RELATIVE STRONG CONVEXITY

Recent works such as [\(Gower et al., 2019\)](#) and [\(Karimireddy et al., 2018\)](#) introduce the concepts of relative-smoothness, relative strong convexity and  $c$ -stability. These are weaker conditions than assumed in this paper. With these conditions, the proof techniques used to analyze coordinate descent algorithms are applicable to Newton-like algorithms, where instead of a fixed matrix  $\mathbf{M}$ , the actual Hessian  $\mathbf{H}(x)$  can be used. The extension to  $c$ -stability is done trivially in Theorem 2 of [Karimireddy et al. \(2018\)](#), here we focus on a slightly more elaborate connection with relative smoothness and relative strong-convexity.

**Assumption 3** ([Gower et al. \(2019\)](#)). *There exists a constant  $\tilde{L} \geq \tilde{\mu}$  such that for all  $x, y \in \mathcal{Q} \subseteq \mathbb{R}^d$ , where  $\mathcal{Q} := \{x \in \mathbb{R}^d : f(x) \leq f(x_0)\}$ :*

$$f(x) \leq f(y) + \langle \nabla f(y), x \rangle + \frac{\tilde{L}}{2} \|x - y\|_{\mathbf{H}(y)} \quad (19)$$

and

$$f(x) \geq f(y) + \langle \nabla f(y), x \rangle + \frac{\tilde{\mu}}{2} \|x - y\|_{\mathbf{H}(y)}. \quad (20)$$

Now the task is to analyze the algorithm with the following update rule, which is identical to general Newton rule when  $S = [d]$ ,

$$x_{k+1} = x_k - \gamma(\mathbf{H}(x_k)_{S_k})^+ \nabla f(x_k). \quad (21)$$

We fix a particular choice of  $\gamma = 1/\tilde{L}$ . This should be contrasted with the update rule (3).

Now given these assumption, we are able to show that the constant akin to  $\sigma(\hat{S})$  appears in the analysis of this algorithm by utilizing the notions from (Gower et al., 2019). We sacrifice generality for the sake of brevity, and assume that range of  $\mathbf{H}(x)$  spans whole  $\mathbb{R}^d$  for each  $x \in \mathcal{Q}$ . Then, the following quantities resembling  $\sigma(\hat{S})$  appear in the convergence analysis of the update rule (21)

$$\hat{\sigma}(\hat{S}, x) = \lambda_{\min} \left( \mathbb{E}_{\hat{S}} \left[ \mathbf{H}^{1/2}(x) (\mathbf{H}(x)_{\hat{S}})^+ \mathbf{H}(x)^{1/2} \right] \right) \quad (22)$$

and

$$\hat{\sigma}(\hat{S}) = \min_{x \in \mathcal{Q}} \hat{\sigma}(\hat{S}, x)$$

**Theorem 3** (Theorem 3.1 of Gower et al. (2019), modified). *Let  $f$  satisfy Assumption 3, and let  $\mathbf{H}(x)$  be the Hessian at  $x$  having range that spans whole  $\mathbb{R}^d$  for all  $x$ . Then*

$$\mathbb{E}_{\hat{S}}[f(x_{k+1}) - f(x^*)] \leq \left( 1 - \frac{\hat{\sigma}(\hat{S}, x_k) \mu}{L} \right) (f(x_k) - f(x^*)),$$

and

$$\mathbb{E}_{\hat{S}}[f(x_k) - f(x^*)] \leq \left( 1 - \frac{\hat{\sigma}(\hat{S}) \mu}{L} \right)^k (f(x_0) - f(x^*)),$$

where  $\hat{\sigma}(\hat{S}) = \min_{x \in \mathcal{Q}} \hat{\sigma}(\hat{S}, x)$  as in Equation (22).

*Proof.* Minimizing the upper bound in (19) restricted to coordinates in  $S_k$ , we arrive at,

$$\begin{aligned} f(x_{k+1}) - f(x_k) &\stackrel{(2)}{\leq} -\frac{1}{2\tilde{L}} \langle \nabla f(x_k), (\mathbf{H}(x_k)_{S_k})^+ \nabla f(x_k) \rangle \\ \mathbb{E}[f(x_{k+1}) - f(x_k)] &\leq -\frac{1}{2\tilde{L}} \langle \nabla f(x_k), \mathbb{E}_{\hat{S}}[(\mathbf{H}(x_k)_{S_k})^+] \nabla f(x_k) \rangle \\ &\stackrel{(20), (22)}{\leq} -\frac{\mu}{L} \hat{\sigma}(\hat{S}, x) (f(x_k) - f(x^*)) \\ &\leq -\frac{\mu}{L} \hat{\sigma}(\hat{S}) (f(x_k) - f(x^*)) \end{aligned}$$

rearranging finishes the proof. □

The following corollary states that with DPP sampling, the update rule in (21) can have a more interpretable convergence rate than stated in the Theorem 3.

**Corollary 1** (of Theorem 3). *Under the assumption of Theorem 3, let additionally  $S_k$  be a sample from sampling  $\hat{S}_k \sim \text{DPP}(\frac{1}{\alpha} \mathbf{H}(x_k))$ , then*

$$\mathbb{E}_{\hat{S}_k}[f(x_{k+1}) - f(x^*)] \leq \left( 1 - \left( \frac{\lambda(x_k)}{\lambda(x_k) + \alpha} \right) \frac{\mu}{L} \right) (f(x_k) - f(x^*)),$$

where  $\lambda(x_k) = \lambda_{\min}(\mathbf{H}(x_k))$ .

The following lemma relates the complexity quantity defined above to the definition of  $\sigma(\hat{S})$  used in the main body of this paper. Note that  $\hat{\sigma}$  is larger than  $\sigma$ , even if the fixed over-approximation exists, as previously we assumed the over-approximation to be valid globally not just in  $\mathcal{Q}$ .

**Lemma 7.** *If for all  $x \in \mathcal{Q}$ ,  $\mathbf{M} \succeq \mathbf{H}(x) \succeq \kappa \mathbf{M} \succ 0$ , then*

$$\hat{\sigma}(\hat{S}) \geq \kappa \sigma(\hat{S}).$$

*The relative smoothness, and strong-convexity can be chosen to be  $\tilde{L} = 1$ , and  $\tilde{\mu} = 1$ , respectively.*

*Proof.*

$$\begin{aligned} \hat{\sigma}(\hat{S}) &= \min_{x \in \mathcal{Q}} \min_{v \in \mathbb{R}^d} \frac{\langle v, \mathbb{E}_{\hat{S}} [\mathbf{H}^{1/2}(x)(\mathbf{H}(x)_{\hat{S}})^+ \mathbf{H}(x)^{1/2}] v \rangle}{\|v\|_2^2} = \min_{v \in \mathbb{R}^d} \min_{x \in \mathcal{Q}} \frac{\langle v, \mathbb{E}_{\hat{S}} [\mathbf{H}^{1/2}(x)(\mathbf{H}(x)_{\hat{S}})^+ \mathbf{H}(x)^{1/2}] v \rangle}{\|v\|_2^2} \\ &\geq \min_{v \in \mathbb{R}^d} \frac{\langle v, \mathbb{E}_{\hat{S}} \kappa [\mathbf{M}^{1/2}(\mathbf{M}_{\hat{S}})^+ \mathbf{M}^{1/2}] v \rangle}{\|v\|_2^2} = \kappa \sigma(\hat{S}) \end{aligned}$$

□

## D OTHER SAMPLINGS

The convergence properties of RNM with determinantal sampling depend solely on the spectral properties of  $\mathbf{M}$ . This is not true of other common samplings such as  $\tau$ -nice. Indeed we can improve or worsen the performance of  $\tau$ -nice sampling when  $\mathbf{M}$  is transformed via spectrum preserving operation such as unitary transformation

$$\mathbf{M} \leftarrow \mathbf{R}^\top \mathbf{M} \mathbf{R}, \text{ where } \mathbf{R}^\top \mathbf{R} = \mathbf{I}.$$

Suppose that we are given an eigenvalues of the matrix  $\mathbf{M}$ , for any sampling  $\hat{S}$  is it possible to find a spectrum preserving rotation such that  $\sigma(\hat{S})$  is at least as small as  $\sigma(\hat{S}_{\text{DPP}})$  which corresponds to DPP sampling with the same expected cardinality? The answer turns out to be negative, and we show counter-example.

**Remark 2** (Counter-example). *Let  $\hat{S}_1$  be a sampling such that  $[n]$  is sampled with  $1/2$  probability and  $\emptyset$  and  $1/2$  probability. The expected size of the subset  $\mathbb{E}[|\hat{S}_1|] = d/2$  and  $\sigma(\hat{S}_1) = \frac{1}{2}$  irrespective of the matrix  $\mathbf{M}$ .*

*Suppose matrix  $\mathbf{M}$  has degenerate spectrum such that  $\lambda$  is eigenvalue with multiplicity  $d/2$  and  $\mu$  is eigenvalue with  $d/2$  multiplicity where  $\lambda < \mu$ . In order s.t.  $\mathbb{E}[|\hat{S}_{\text{DPP}}|] = \frac{d}{2}$ ,  $\alpha = \sqrt{\lambda\mu}$ , then  $\sigma(\hat{S}_{\text{DPP}}) < \frac{1}{2}$ .*

In what circumstances does DPP sampling perform better than a uniform sampling? First, we consider circumstances where uniform sampling is optimal.

### D.1 Uniform sampling

It is important to allow for variation in the off-diagonal of  $\mathbf{M}$ . If we consider only diagonal  $\mathbf{M}$ , the optimal sampling is uniform sampling.

**Lemma 8.** *Let  $\mathbf{M}$  be diagonal. The quantity  $\sigma(\hat{S})$  of a sampling over a power set  $P([d])$  constrained by  $\mathbb{E}[|\hat{S}|] = k$  is maximized for uniform samplings.*

*Proof of Lemma 8.* We want to maximize the minimum eigenvalue of a matrix  $\mathbf{M}^{1/2} \mathbb{E}[(\mathbf{M}_S)^{-1}] \mathbf{M}^{1/2}$ . For a diagonal  $\mathbf{M}$  we know that  $(\mathbf{M}_S)^{-1} = (\mathbf{M}^{-1})_S$ . Hence,  $\mathbf{M}^{1/2} \mathbb{E}[(\mathbf{M}_S)^{-1}] \mathbf{M}^{1/2} \mathbf{D}(p)$ , where  $p$  is a vector of marginals  $p_i = P(i \in \hat{S})$ . Hence, the minimum eigenvalue is the minimum marginal probability subject to a constraint that  $\mathbb{E}[|\hat{S}|] = \sum_{j=1}^d P(j \in \hat{S}) \leq k$ . This leads to an optimum where  $P(i \in \hat{S}) = P(j \in \hat{S})$  for all  $i, j \in [d]$ . Hence the optimal sampling distribution is uniform. □

### D.2 Parallel Sampling

The parallel extension of the update method 3 has been considered in [Mutný and Richtárik \(2018\)](#) and [Karimireddy et al. \(2018\)](#). Namely, the authors consider a case, when the updates with  $c$  machines are aggregated together to form a single update in the form  $\approx \frac{1}{b} \sum_{j=1}^c (\mathbf{M}_{S_j})^+$ , where  $b$  is the aggregating parameter. It is known that for parallel disjoint samplings the convergence rate increases linearly with the number of processors. For independent samplings the aggregating parameter  $b$  depends on the quantity,

$$\theta(\hat{S}) = \lambda_{\max}(\mathbf{M}^{1/2} \mathbb{E}[(\mathbf{M}_{\hat{S}})^+] \mathbf{M}^{1/2})$$

which in the case of DPP sampling is equal to  $\theta = \frac{\lambda_1}{\lambda_1 + \alpha}$ . The quantity  $\theta(\hat{S}) \in [\sigma(\hat{S}), 1]$ , and as  $\theta \rightarrow 1$ , the aggregation operation becomes averaging  $b \rightarrow c$ . For DPP sampling, we can see an inverse relationship between increasing  $\sigma(\hat{S})$  by increasing block size, which inherently makes the parallelization problem more difficult by increasing  $\theta(\hat{S})$ .
